# Supplementary material for: Amorphous carbon framework stabilized SnO2 porous nanowires as high performance Li-ion battery anode materials
Source: Royal Society of Chemistry journal article supplement (doi:10.1039/c5ra05372b), 2015-01-01
Supplement: c5ra05372b1.pdf [file c5ra05372b1.pdf]

## Amorphous Carbon Framework Stabilized SnO<sub>2</sub> Nanowires as Anode Materials for High Performance Li-ion Batteries

Banghong Zhou,<sup>1</sup> Shuanglei Yang,<sup>1</sup> Laidi Wu,<sup>1</sup> Wei Wu,<sup>2</sup> Weifeng Wei,<sup>1</sup> Libao

Chen,<sup>1</sup> Hongbo Zhang,<sup>1</sup> Jun Pan<sup>1,\*</sup> Xiang Xiong<sup>1,\*</sup>

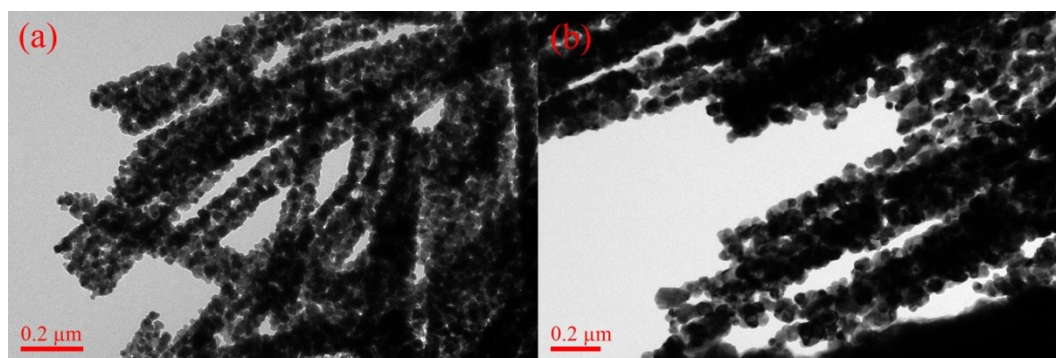

**Figure S1** the morphology of the SnO<sub>2</sub> NWs under different heating rate. (a) ~ 5 °C/min; (b) ~ 10 °C/min

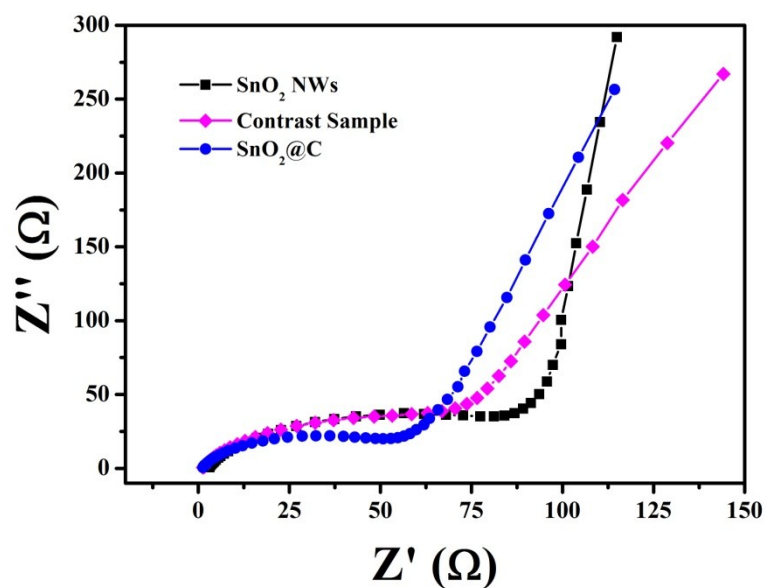

**Figure S2** the electrochemical impedance spectra of different electrodes;
